# Supplementary material for: The “nano to micro” transition of hydrophobic curcumin crystals leading to in situ adjuvant depots for Au-liposome nanoparticle mediated enhanced photothermal therapy
Source: Royal Society of Chemistry journal article supplement (doi:10.1039/c9bm00932a), 2019-01-01
Supplement: c9bm00932a1.pdf [file c9bm00932a1.pdf]

### Supporting data

## The “Nano to Micro” transition of hydrophobic curcumin crystals leading to in situ adjuvant depots for Au-liposome nanoparticles mediated enhanced photothermal therapy

Syed Baseeruddin Alvi<sup>a†</sup>, Appidi Tejaswini<sup>a,b†</sup>, Deepak B. Pemmaraju<sup>a†</sup>, Rajlakshmi P S<sup>a</sup>, Minhas Gillipsie<sup>a,d</sup>, Surya Prakash Singh<sup>a</sup>, Afreen Begum<sup>c</sup>, Bantal Veeresh<sup>c</sup>, Rohit Srivastava<sup>b</sup>, Nooruddin Khan<sup>d\*</sup>, Aravind Kumar Rengan<sup>a\*</sup>

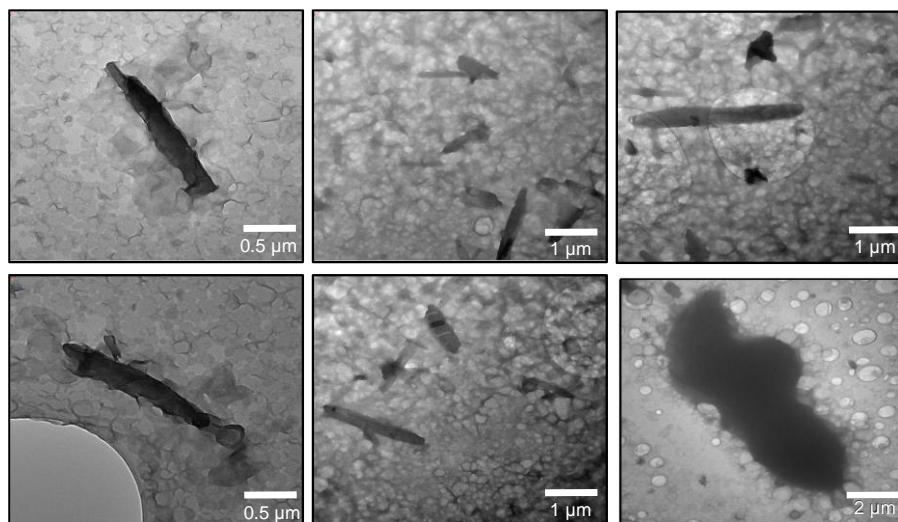

**Figure S 1:** TEM imaging of curcumin microcrystals (CMC's) from Lipos Cur NPs

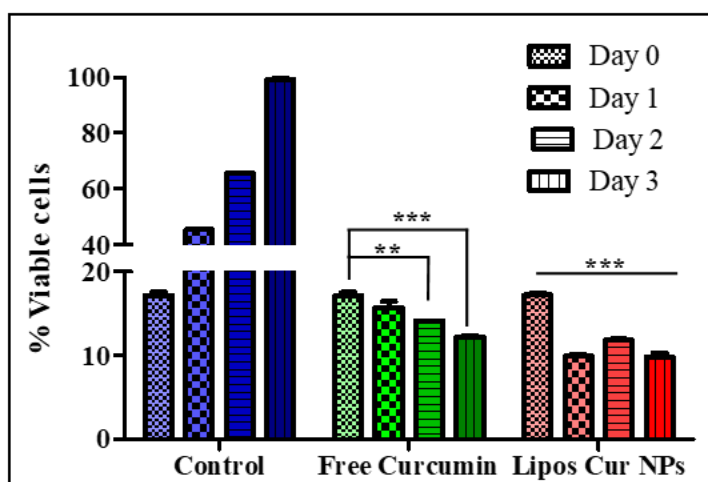

**Figure S2:** Cytotoxicity of Free Curcumin and Lipos Cur NPs assessed by MTT. (\* $P < 0.05$ ,

\*\* $P < 0.01$ , \*\*\* $P < 0.001$ )

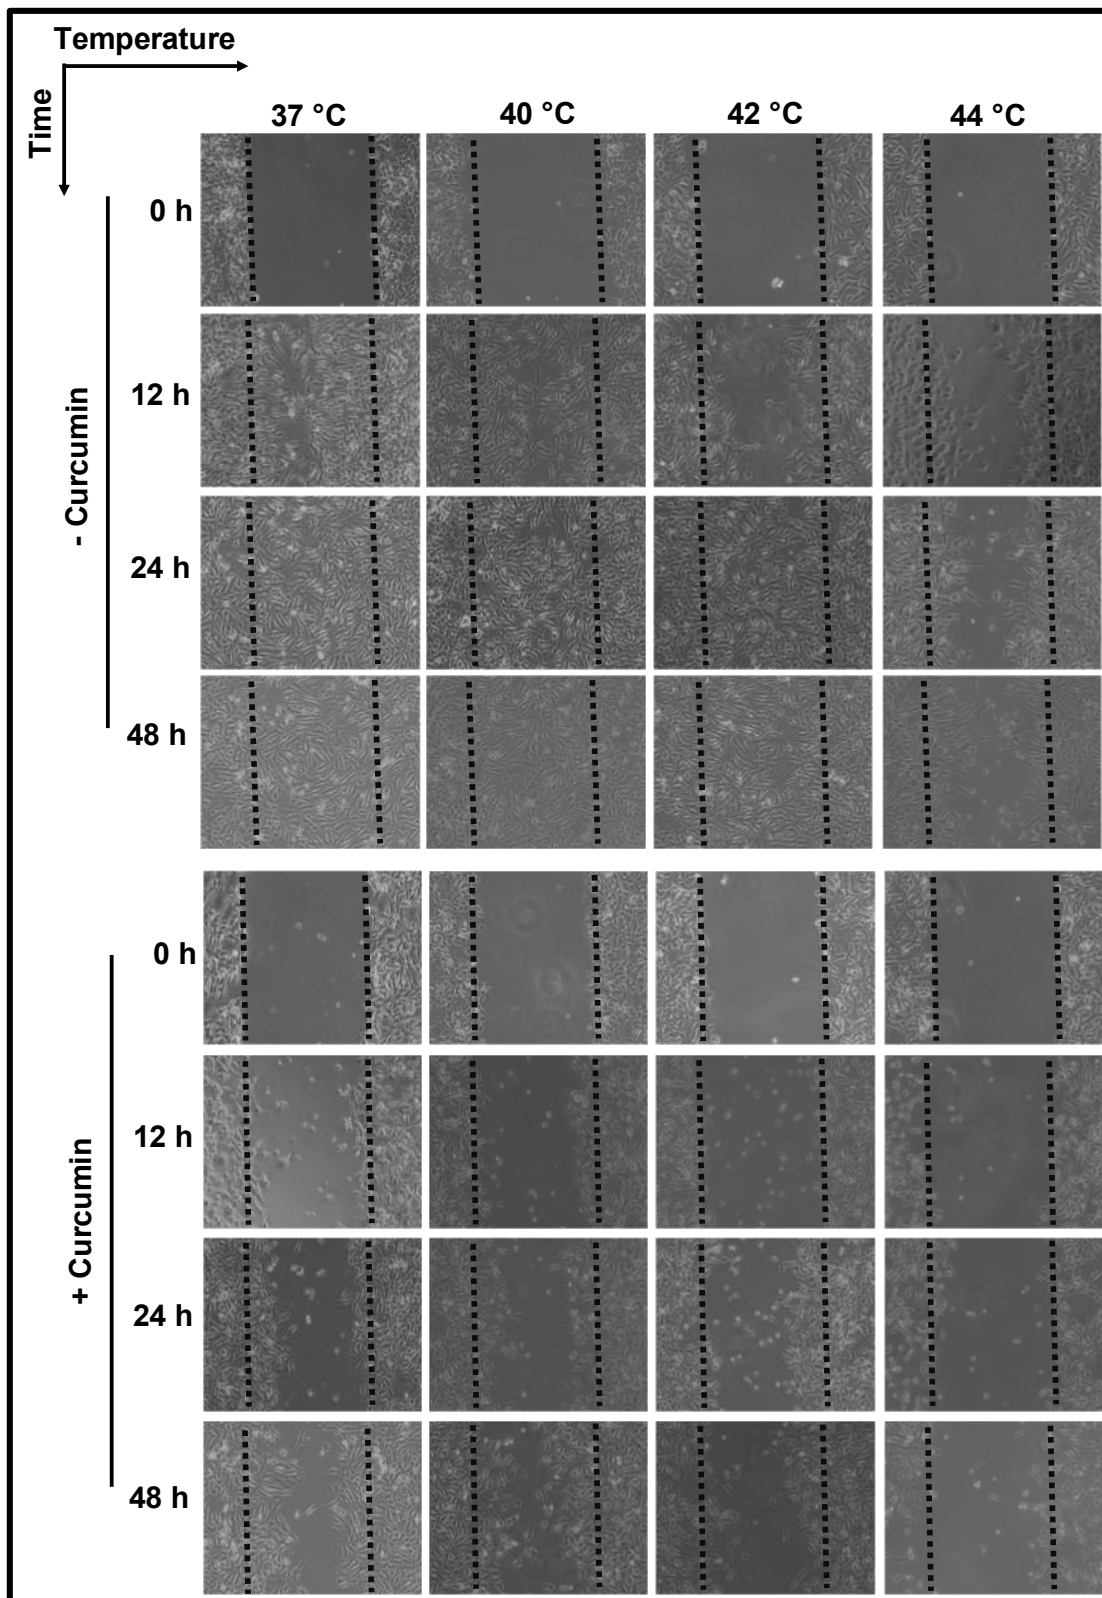

**Figure S3:** Effect of temperature (37, 40, 42, 44 °C) with & without curcumin on cell migration.

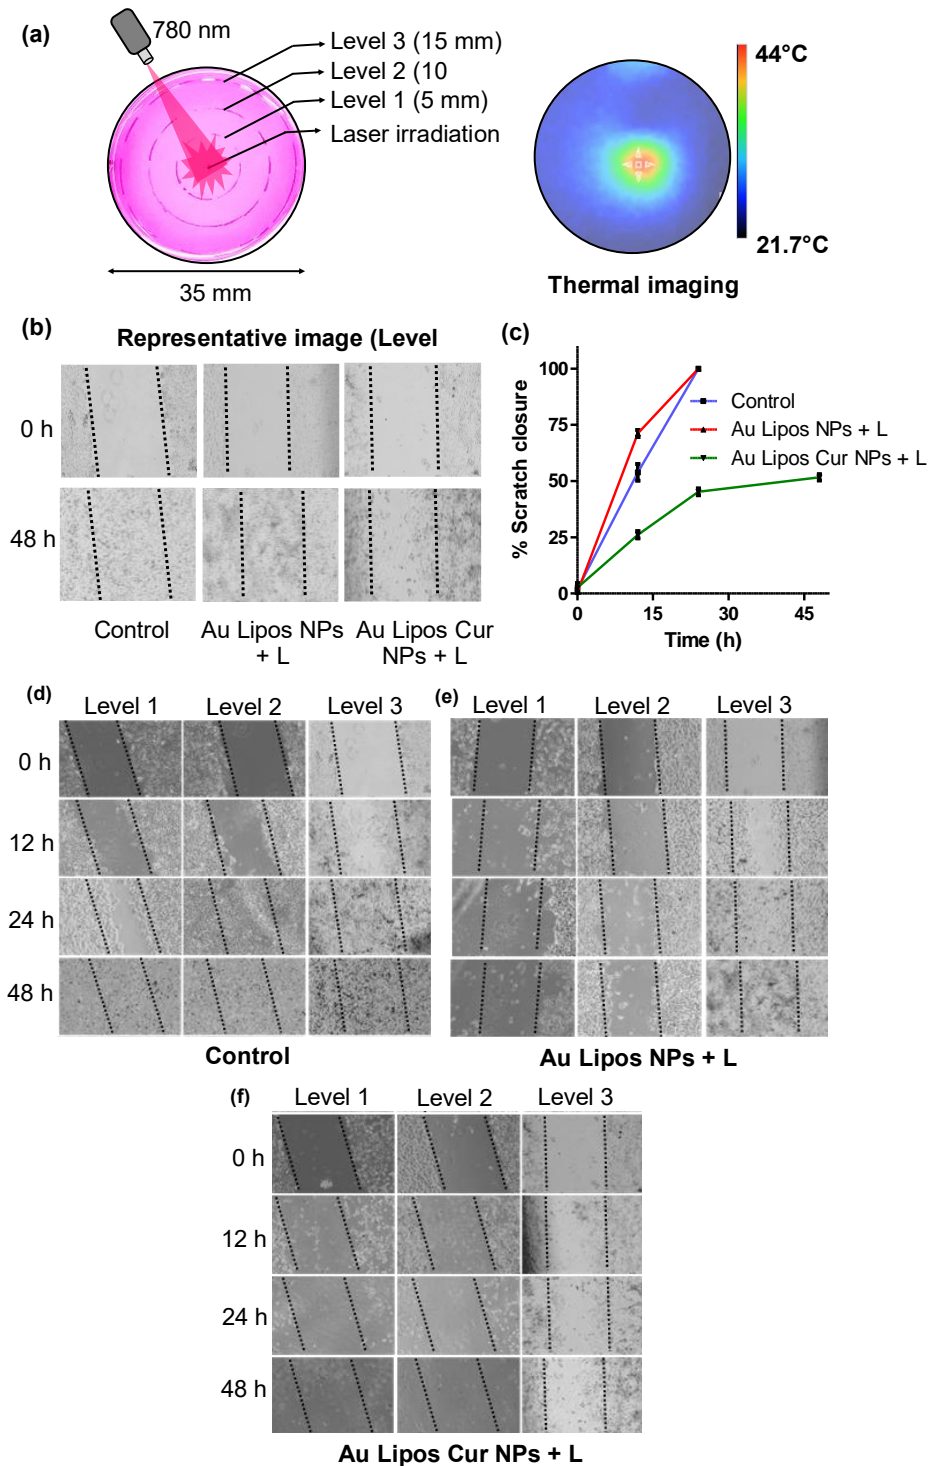

**Figure S4:** A Modified scratch assay for the assessment of photothermal therapy on cell migration. **(a)** Schematic representation shows concentric scratches at 5, 10 & 15 mm designated as level 1,2 & 3 respectively from the center. **(b & c)** Representative image of cell migration (wound closure at level 3). **(d, e & f)** wound closure of Control, Au Lipos NPs+L, Au Lipos Cur NPs + L at level 1,2 & 3 respectively.

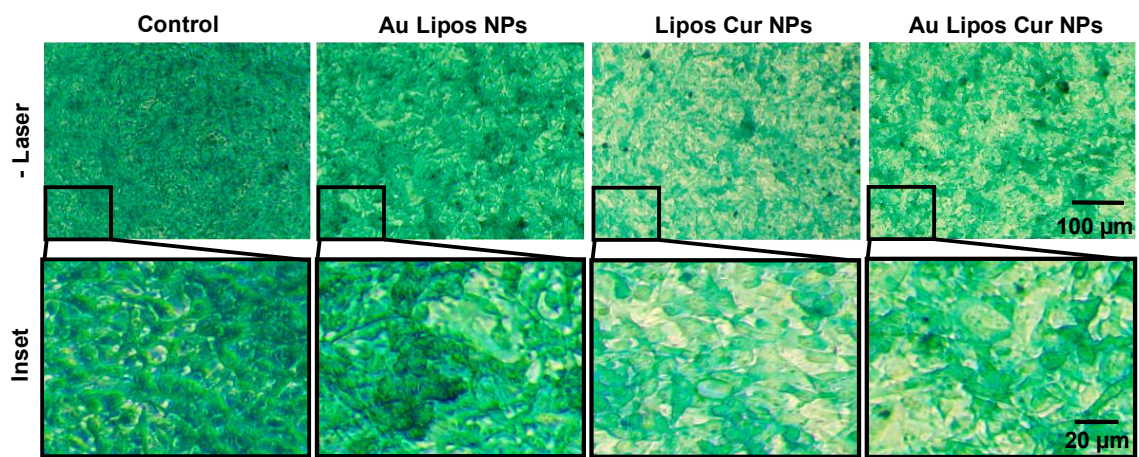

**Figure S5:** Alcian blue binding assay of cancer cells treated with nanoparticles (Au Lipos NPs, Lipos Cur NPs & Au Lipos Cur NPs) without laser irradiation.

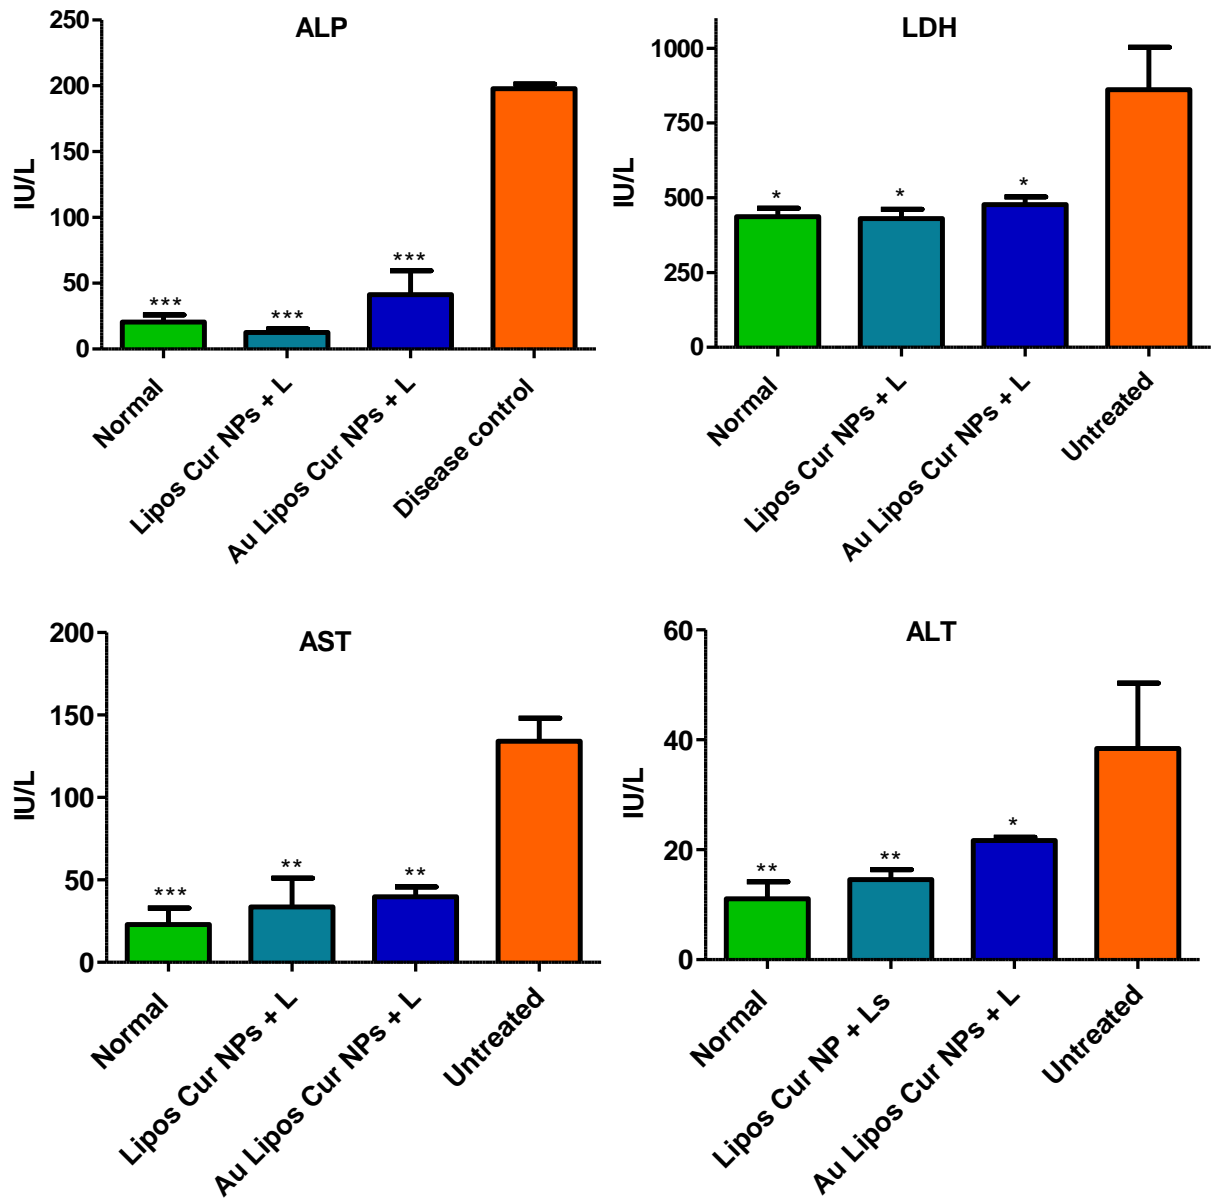

**Figure S6:** Endpoint estimation of serum parameters showing a significant rise in ALP, LDH, AST, ALT among disease control when compared to normal and treated groups. (\* $P < 0.05$ , \*\* $P < 0.01$ , \*\*\* $P < 0.001$ )
